# Supplementary material
Source: Springer Nature journal article supplement (https://www.springermedizin.de/resource/supplementary/12885_2011_2971_MOESM1_ESM.pdf/9462352)

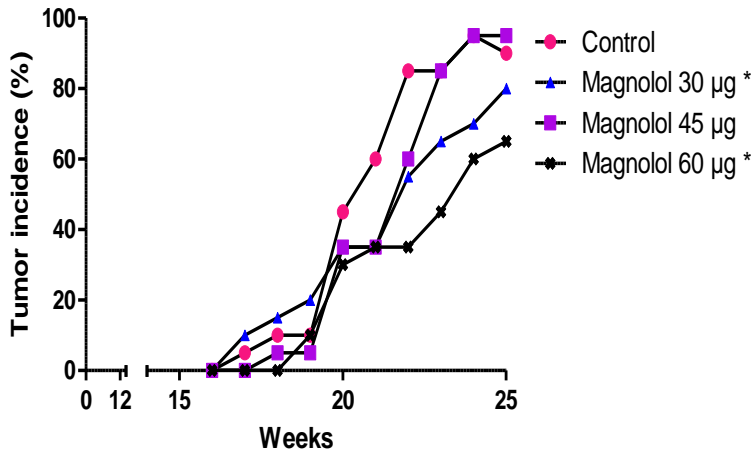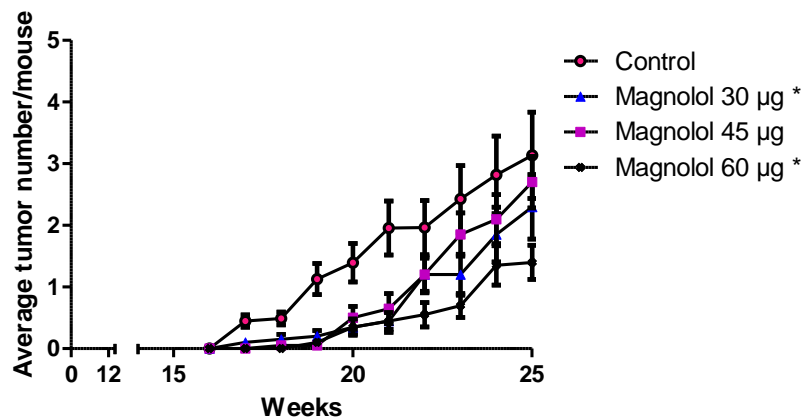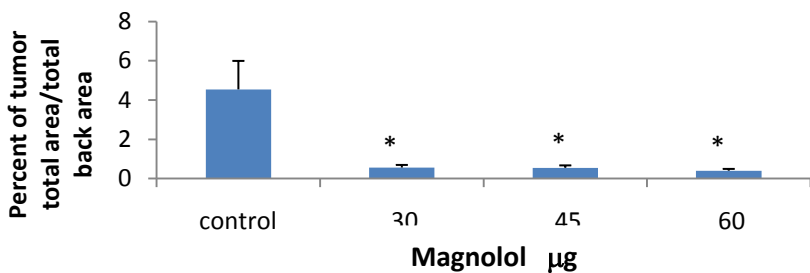

Supplement: MOESM1 [file 9462352]
